# Supplementary material for: The Revised Mood Rhythm Instrument: A Large Multicultural Psychometric Study
Source: MDPI journal article supplement (doi:10.3390/jcm10030388), 2021-01-20

## MOOD RHYTHM INSTRUMENT – Revised version (MRhI-r)

Date: \_\_\_\_/\_\_\_\_/\_\_\_\_ Sex: ( ) F ( ) M Age: \_\_\_\_\_ Subject ID: \_\_\_\_\_

Level of education (years of schooling): \_\_\_\_\_ Date of last period: \_\_\_\_/\_\_\_\_/\_\_\_\_

→ Please read carefully the following examples before answering the questions:

Following each question, a 24-hour period is shown. Each number represents an hour of the clock. The line between the numbers represents the minutes.

Example (A): if you mark a line between 7AM and 8AM, it will represent 7:30 AM

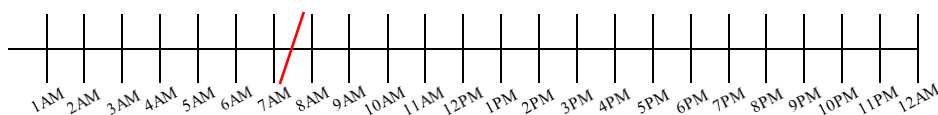

Example (B): If you mark a line on 3PM, it will represent 3:00 PM

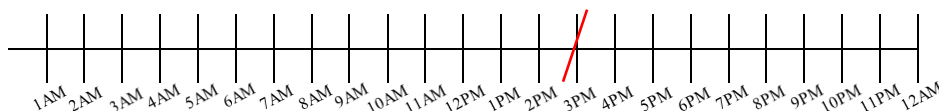

→ Answer the following questions according to the **last 15 days**, taking into account how you have felt most of the time, on the majority of the days.

**1. Is there a specific time of the day when you have felt sleepier?**

( ) Yes ( ) No

If you answer yes, indicate below the approximate hour:

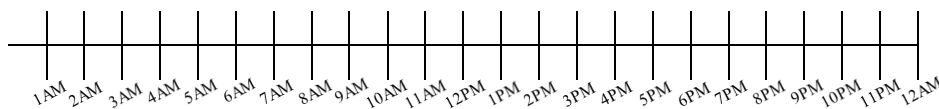

**2. Is there a specific time of the day when you have felt more capable of solving daily problems?**

( ) Yes ( ) No

If you answer yes, indicate below the approximate hour:

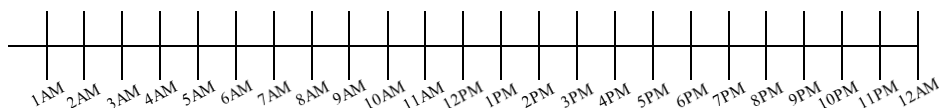

**3. Is there a specific time of the day when you been able to concentrate better?**

( ) Yes ( ) No

If you answer yes, indicate below the approximate hour:

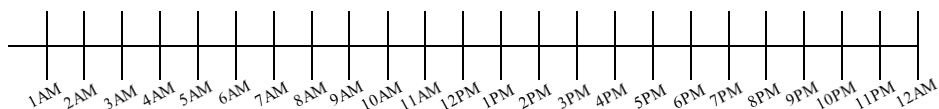

**4. Is there a specific time of the day when you have had an increased appetite?**

( ) Yes ( ) No

If you answer yes, indicate below the approximate hour:

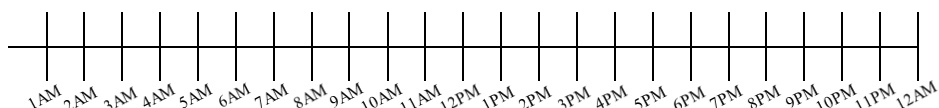

## ***MOOD RHYTHM INSTRUMENT – Revised version (MRhI-r)***

**5. Is there a specific time of the day when your libido (sexual arousal) has been higher?**

( ) Yes ( ) No

If you answer yes, indicate below the approximate hour:

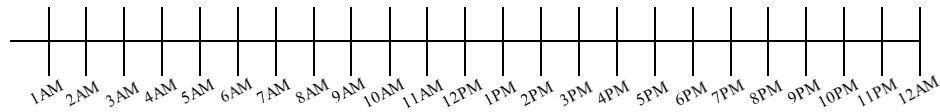

**6. Is there a specific time of the day when you have felt more irritable?**

( ) Yes ( ) No

If you answer yes, indicate below the approximate hour:

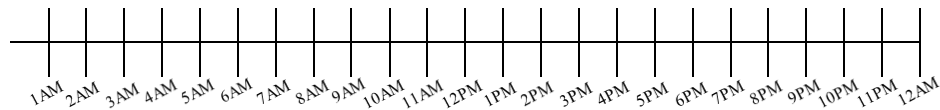

**7. Is there a specific time of the day when you have felt more anxious?**

( ) Yes ( ) No

If you answer yes, indicate below the approximate hour:

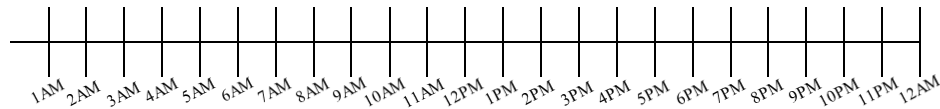

**8. Is there a specific time of the day when you have felt more sad?**

( ) Yes ( ) No

If you answer yes, indicate below the approximate hour:

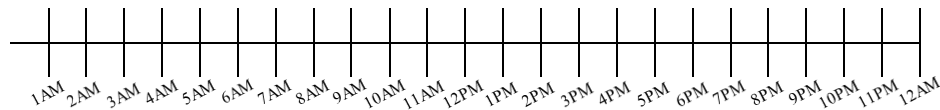

**9. Is there a specific time of the day when your memory has been better?**

( ) Yes ( ) No

If you answer yes, indicate below the approximate hour:

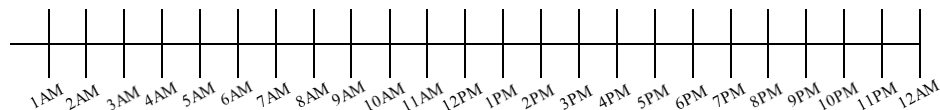

**10. Is there a specific time of the day when you have been more pessimistic?**

( ) yes ( ) No

If you answer yes, indicate below the approximate hour:

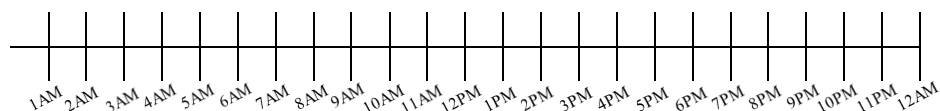

**11. Is there a specific time of day when you have had more energy?**

( ) yes ( ) No

If you answer yes, indicate below the approximate hour:

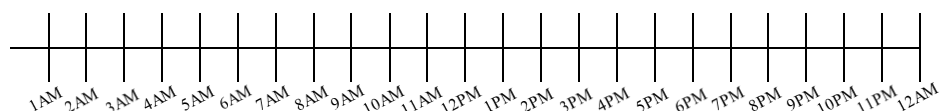

Supplement: s1 [file s1]
